# Supplementary material
Source: PubMed Central journal article supplement (PMC3831485)
Supplement: 1311760110_pnas.201311760SI.pdf [file 1311760110_pnas.201311760SI.pdf]

# Supporting Information

Chang et al. 10.1073/pnas.1311760110

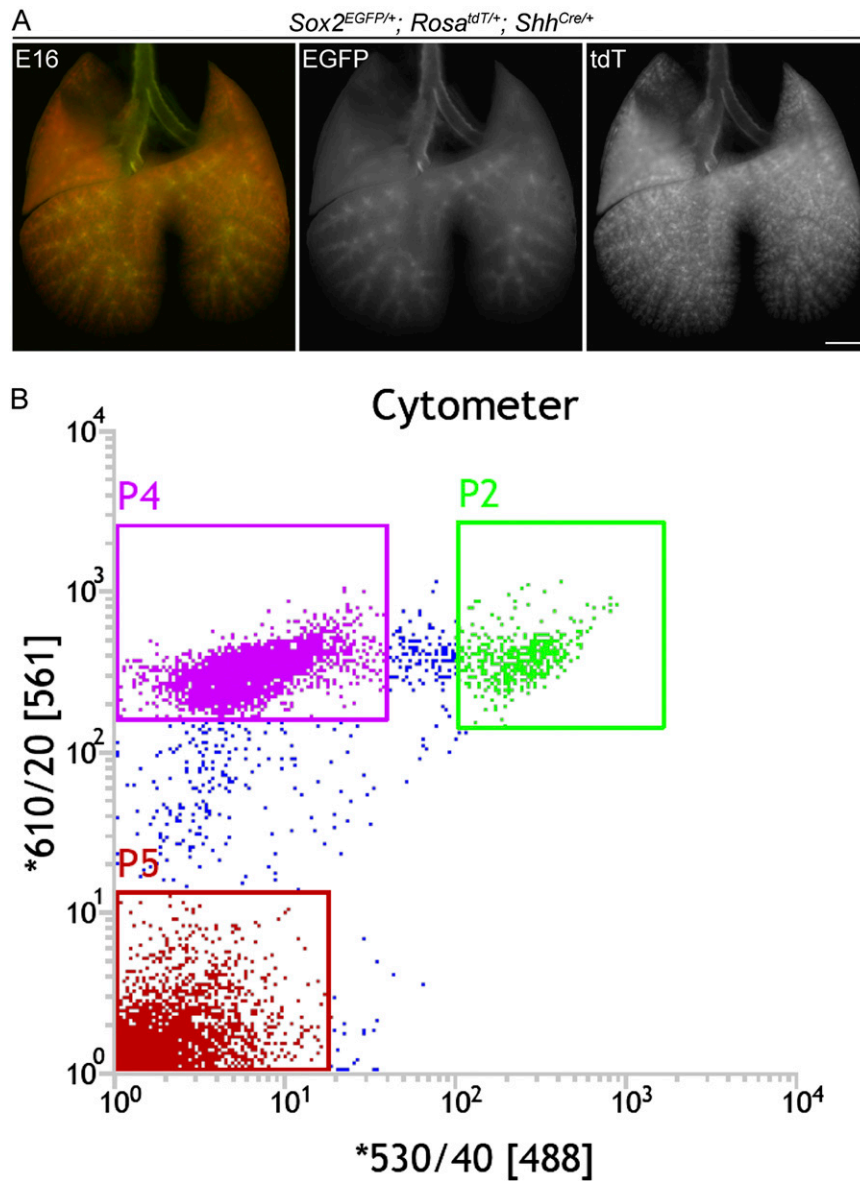

**Fig. S1.** FACS purification of distal lung epithelial cells. (A) Stereoscope images of an embryonic day (E)16 *SRY-box containing gene 2* ( $Sox2$ )<sup>EGFP/+</sup>;  $Rosa^{tdT/+}$ ; *Sonic hedgehog* ( $Shh$ )<sup>Cre/+</sup> lung showing that distal epithelial cells express red (tdT), but not green (EGFP), fluorescent proteins. (Scale bar, 500  $\mu$ m.) (B) A representative FACS graph of E17  $Sox2^{EGFP/+}; Rosa^{tdT/+}; Shh^{Cre/+}$  lungs showing separation of distal epithelial cells (P4 fraction) from proximal epithelial cells (P2 fraction) and nonepithelial cells (P5 fraction).

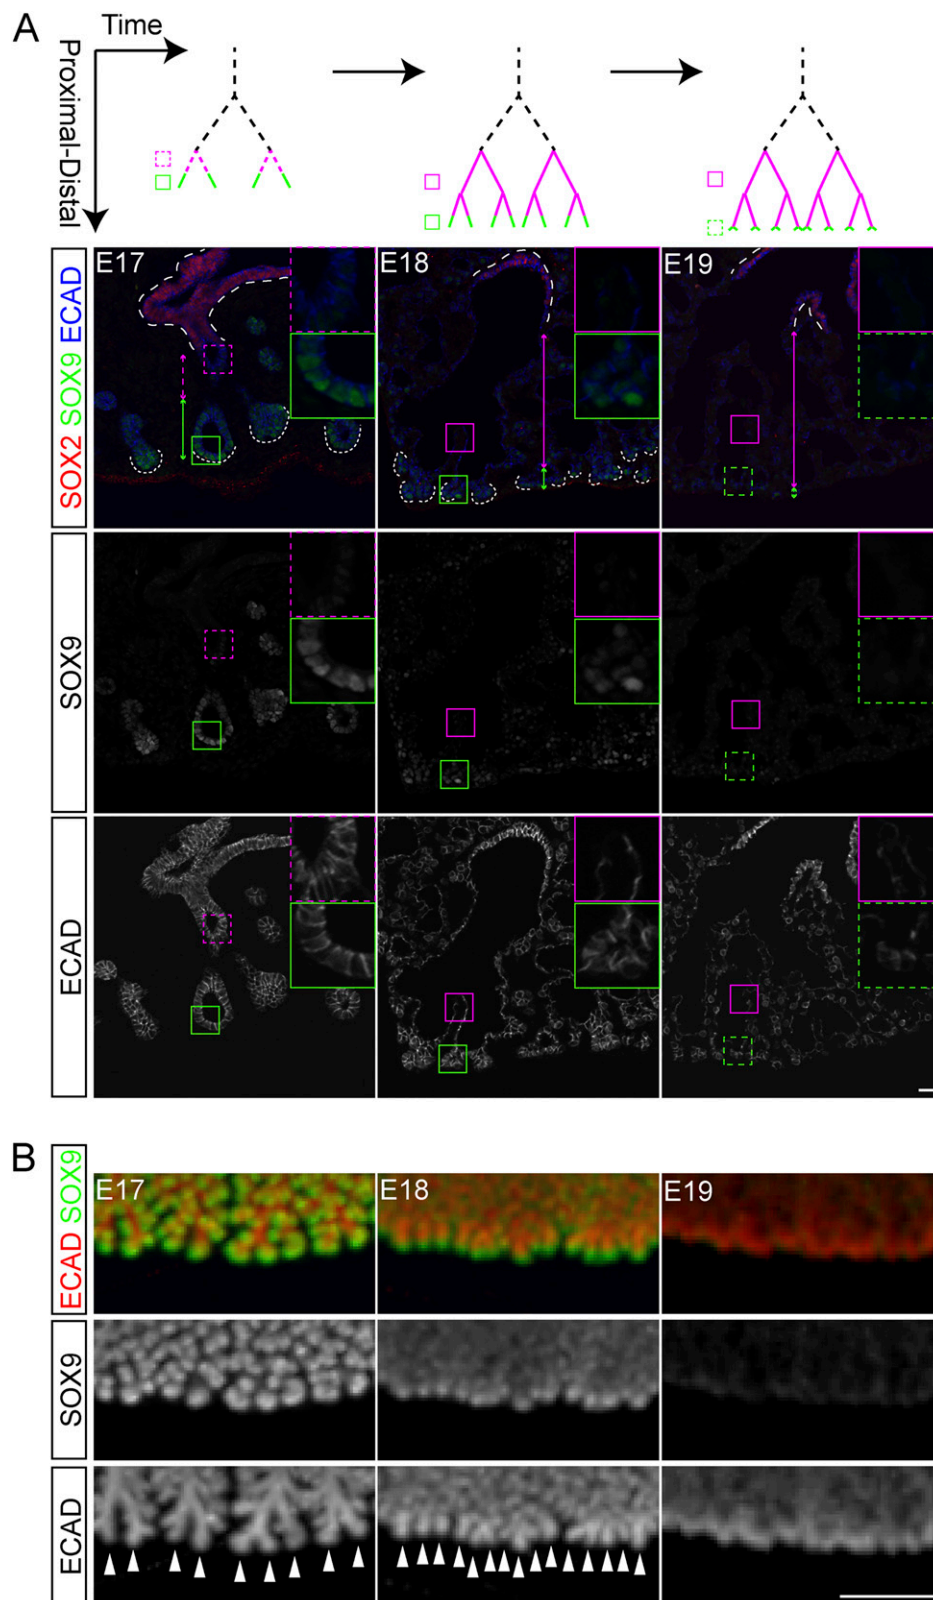

**Fig. S2.** Branching program in late lung development. (**A**) Confocal images of immunostained lung sections in areas where the airway lumen can be continuously traced from the proximal conducting airways (black/white long dashed lines) to the distal nonbranch tip (magenta) and branch tip (green) regions, as illustrated in the schematics. SOX9<sup>+</sup> branch tips are present near the distal edges of E17–E18 lungs. Branch tips are outlined with dashed lines at E17–E18 and are too small to be completely captured on sections at E19. The boxed regions are enlarged (*insets*) outlined in corresponding colors. Dashed magenta and green boxes indicate a low level of alveolar differentiation (Fig. S3) and branching, respectively. The images for E18 lungs are replicated from Fig. 1B. (Scale bar, 20  $\mu\text{m}$ .) (**B**) Optical projection tomography (OPT) images of the distal edges of whole mount immunostained lungs showing an increase in the number of SOX9<sup>+</sup> branch tips from E17 to E18 (arrowheads). Very few cells at the branch tips express SOX9. (Scale bar, 250  $\mu\text{m}$ .)

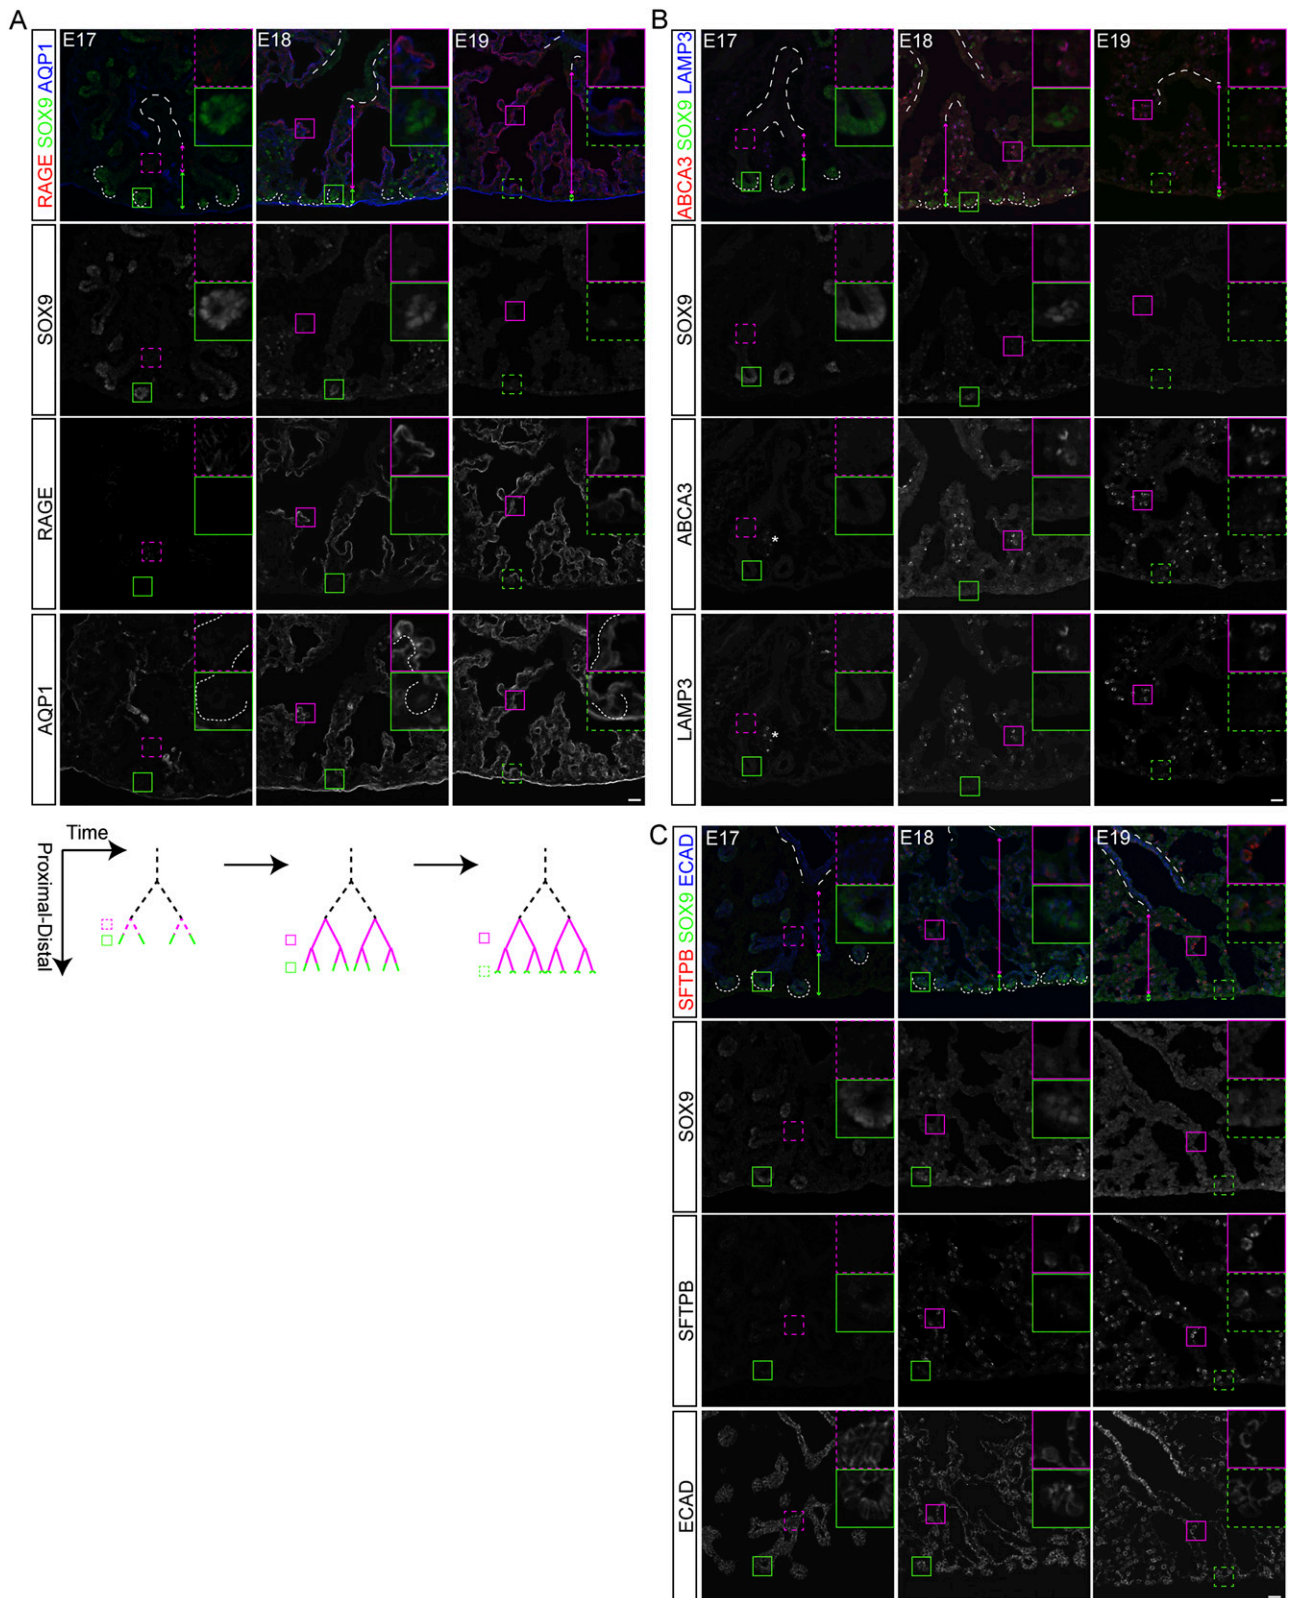



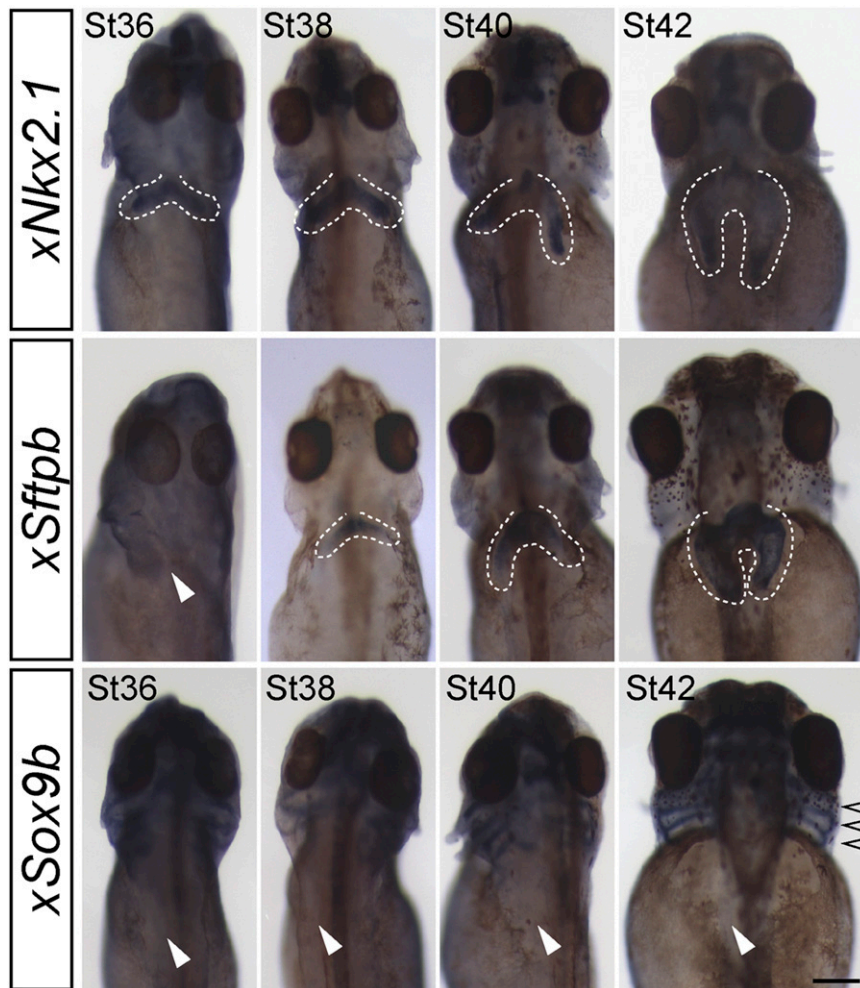

**Fig. S4.** *Xenopus* lungs lack the branching program and *Sox9* expression, and initiates alveolar differentiation immediately after lung specification. Whole mount in situ hybridization of *Xenopus* embryos at indicated stages (St). The lungs are indicated with dashed lines if stained or arrowheads if unstained. Open arrowheads indicate *Sox9* expression in the pharyngeal arches. The onset of *Sftpb* expression is slightly later than that of *Sftpc* expression (Fig. 1C). (Scale bar, 200  $\mu$ m.)

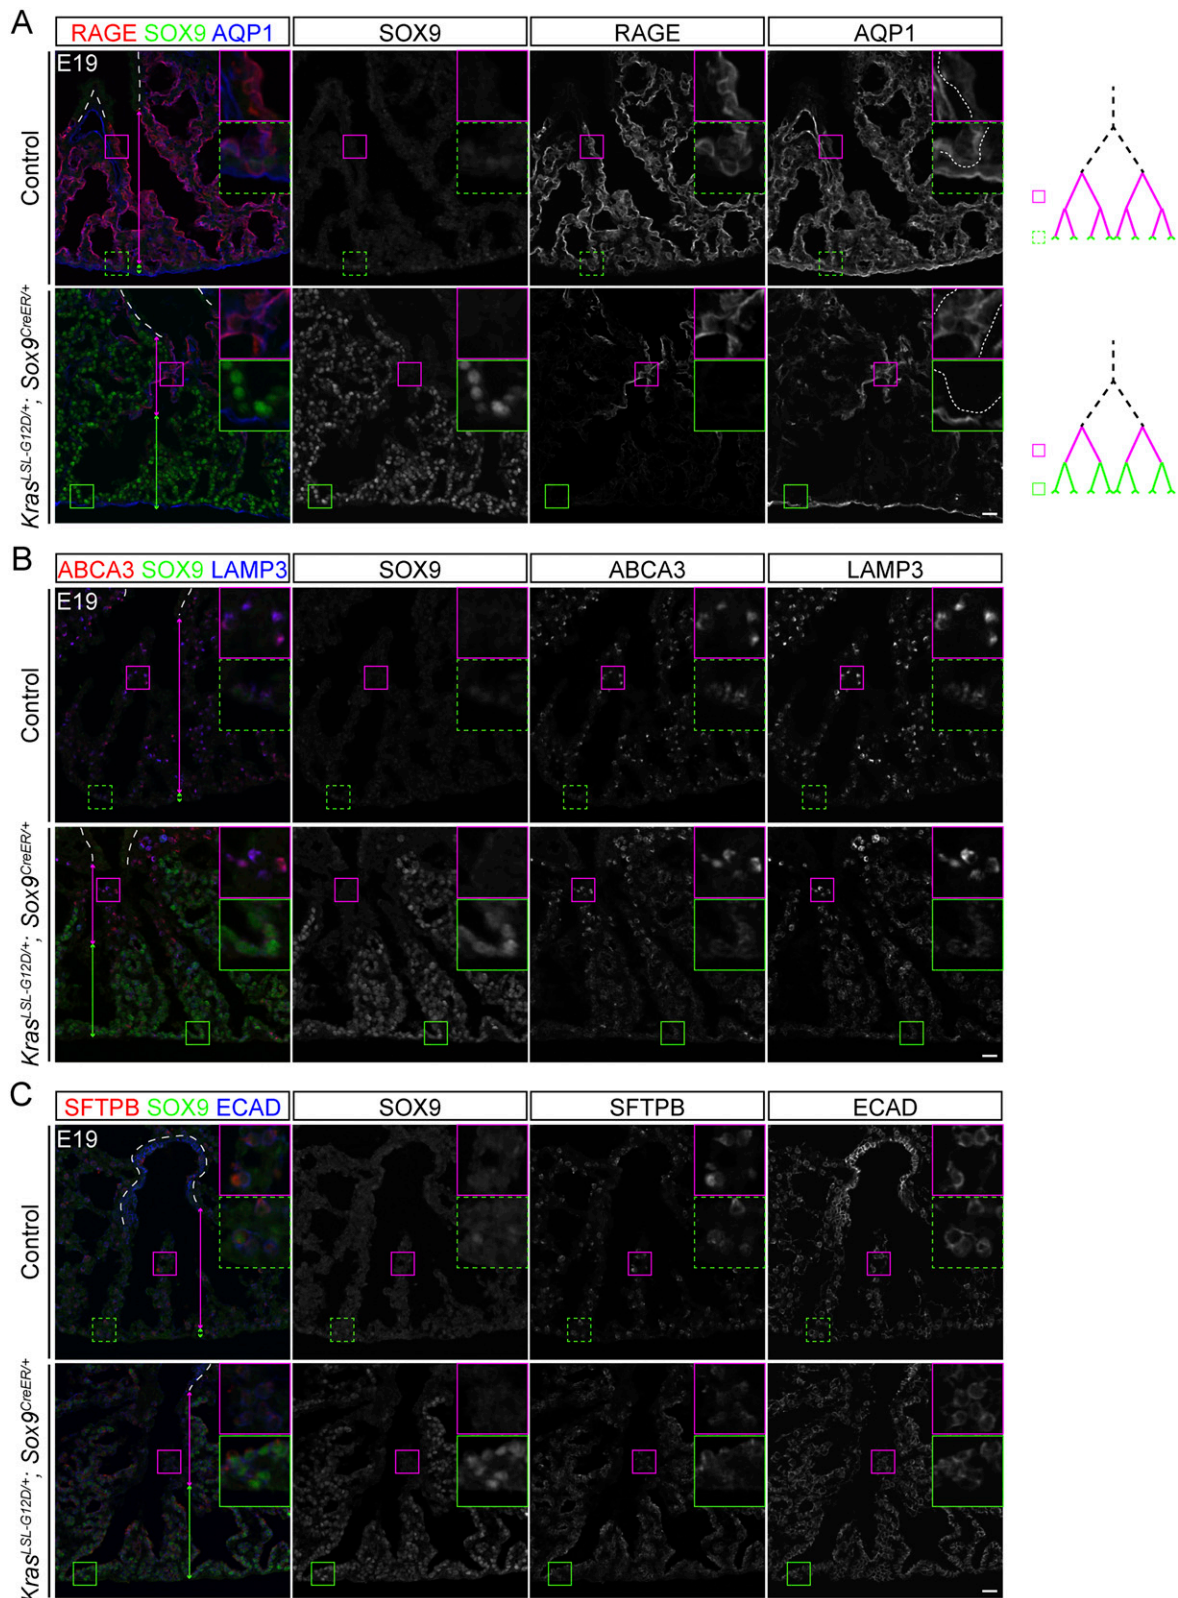

**Fig. S5.** Hyperactive *Kras* suppresses alveolar differentiation. Confocal images of immunostained lung sections in areas where the airway lumen can be continuously traced from the proximal conducting airways (black/white long dashed lines) to the distal nonbranch tip (magenta) and branch tip (green) regions, as illustrated in the schematics. Expression of alveolar type I (AQP1 and RAGE in **A**) and type II (ABCA3 and LAMP3 in **B**) markers is restricted to nonbranch tip regions closer to the conducting airways in the *Kras* mutant lung. Although SFTPB expression is more uniform in the *Kras* mutant, cells in the expanded branching regions are more clustered as shown by ECAD (E-cadherin) staining (**C**). The boxed regions are enlarged (*insets*) outlined in corresponding colors. Dashed green boxes indicate a low level of branching with a few SOX9-positive cells. (Scale bars, 20  $\mu$ m.)

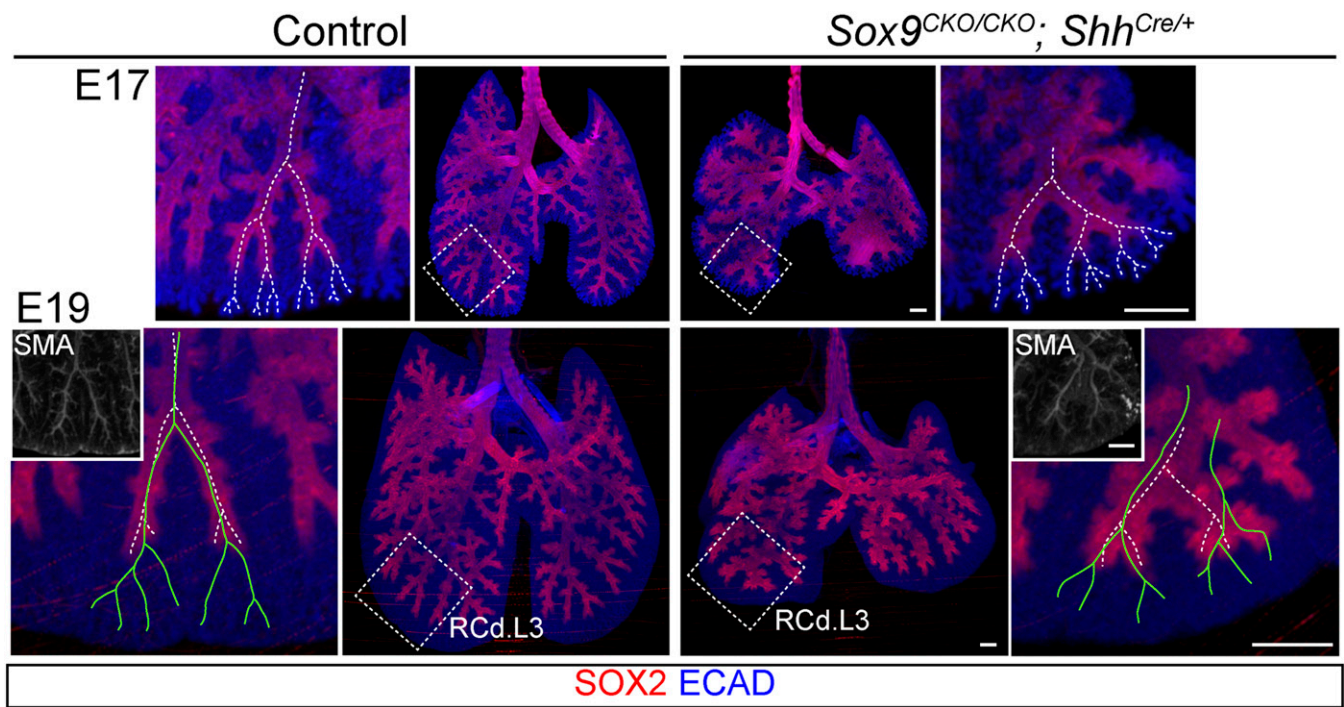

**Fig. S6.** Persistent branching defects and normal coalignment between airway branches and arteries in the *Sox9* mutant lung. OPT images of whole-mount immunostained lungs from littermate control (*Left*) and *Sox9*<sup>CKO/CKO</sup>;*Shh*<sup>Cre/+</sup> mutant (*Right*) embryos. The RCd.L3 branch lineages (1) in the boxed areas are enlarged and traced with dashed lines. Only the SOX2<sup>+</sup> branches are traced for E19. The arteries in E19 lungs immunostained for smooth muscle actin (SMA) are identified by their connection to the main pulmonary arteries, traced with solid green lines and shown (*Insets*). (Scale bars, 250  $\mu$ m.)

1. Metzger RJ, Klein OD, Martin GR, Krasnow MA (2008) The branching programme of mouse lung development. *Nature* 453(7196):745–750.



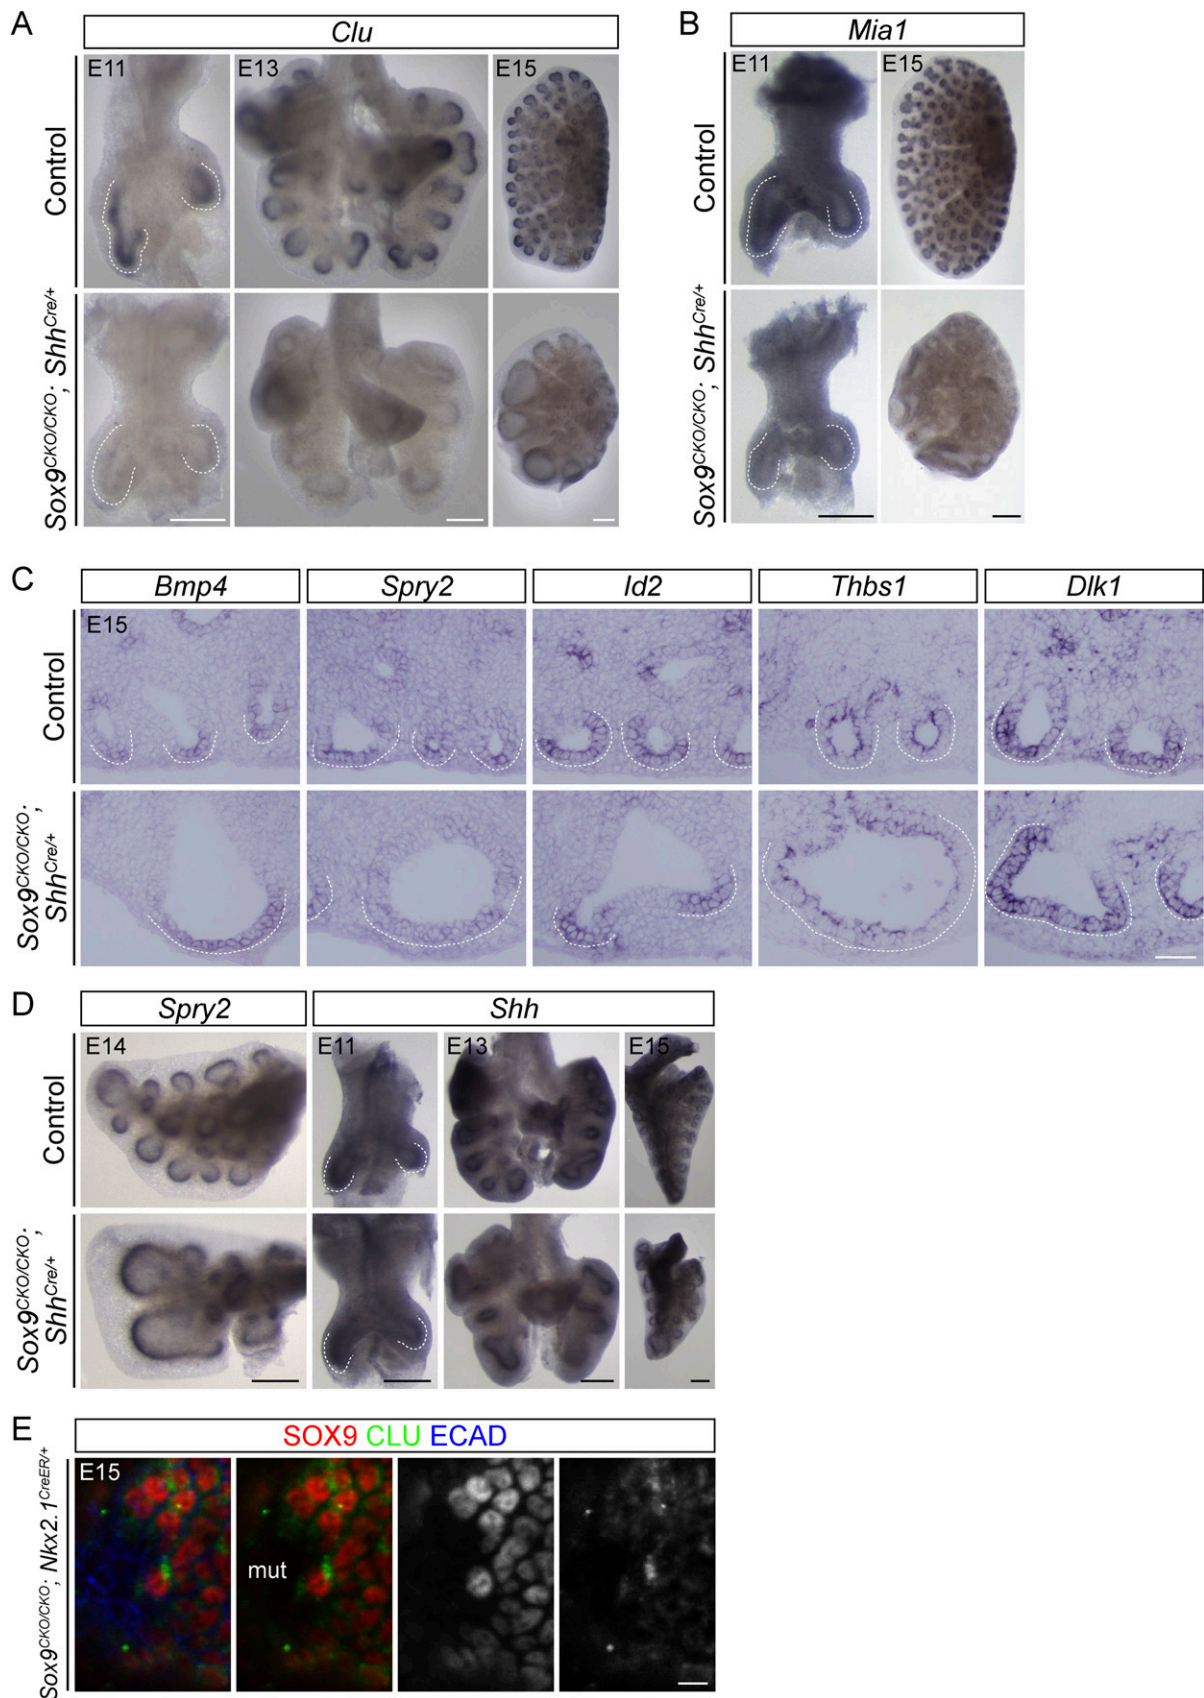

**Fig. 57.** *Sox9*-dependent and -independent branching related genes. Whole-mount (A, B, and D) and section (C) in situ hybridization of littermate control and *Sox9<sup>CKO/CKO</sup>; Shh<sup>Cre/+</sup>* mutant lungs. Expression of *Clusterin (Clu)* and *Melanoma inhibitory activity 1 (Mia1)* is dependent on *Sox9*, whereas expression of *Bmp4*, *Spry2*, *Id2*, *Thbs1*, *Dlk1*, and *Shh* is independent of *Sox9*. Branch tips are traced with dashed lines. [Scale bars, 200  $\mu$ m (A, B, D) and 50  $\mu$ m (C).] (E) Projection images of an E15 whole-mount immunostained *Sox9<sup>CKO/CKO</sup>; Nkx2.1<sup>CreER/+</sup>* mutant lung showing the absence of CLU in *SOX9*<sup>-</sup> cells (mut). (Scale bar, 10  $\mu$ m.)

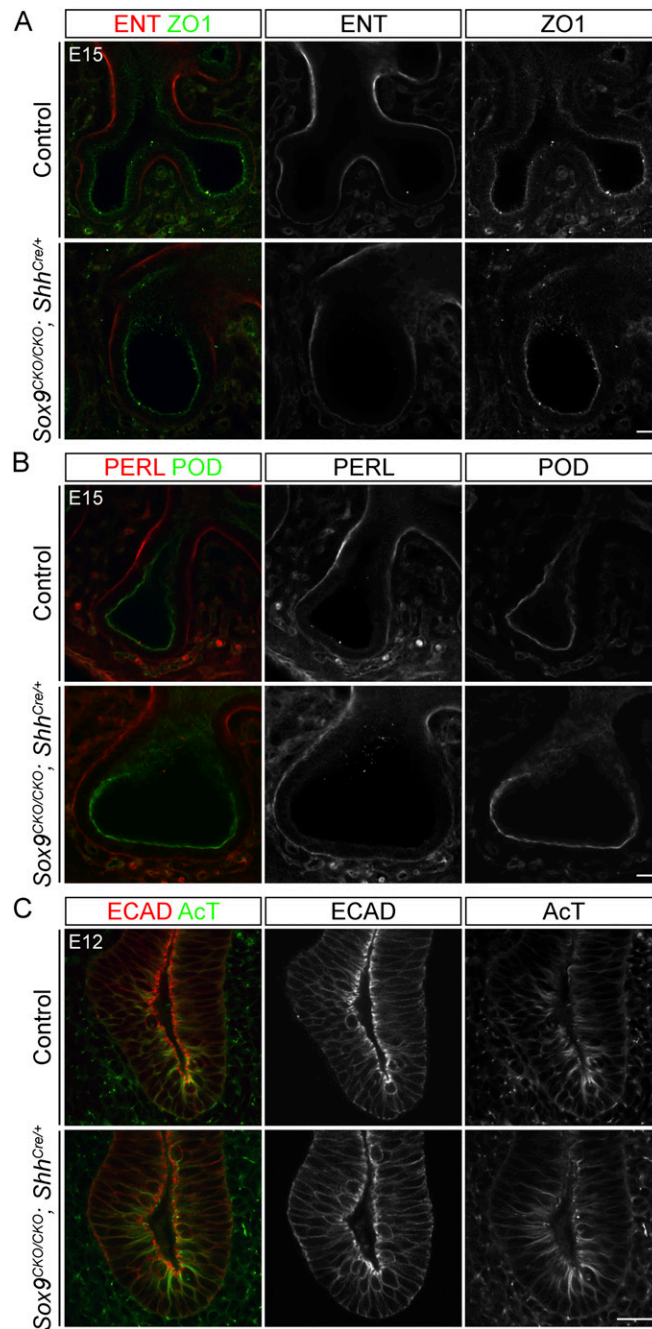

**Fig. S8.** Normal cell polarity in the *Sox9* mutant lung. Confocal images of whole mount immunostained E15 (A and B) and E12 (C) littermate control and *Sox9<sup>CKO/CKO</sup>; Shh<sup>Cre/+</sup>* mutant lungs. The *Sox9* mutant lung has no significant change in the distribution of apical [Zonula occluden 1 (ZO1) and Podocalyxin-like (POD)], basement membrane [Entactin (ENT) and Perlecan (PERL)] and cytoskeleton [acetylated Tubulin (AcT)] markers. (Scale bars, 20  $\mu$ m.)





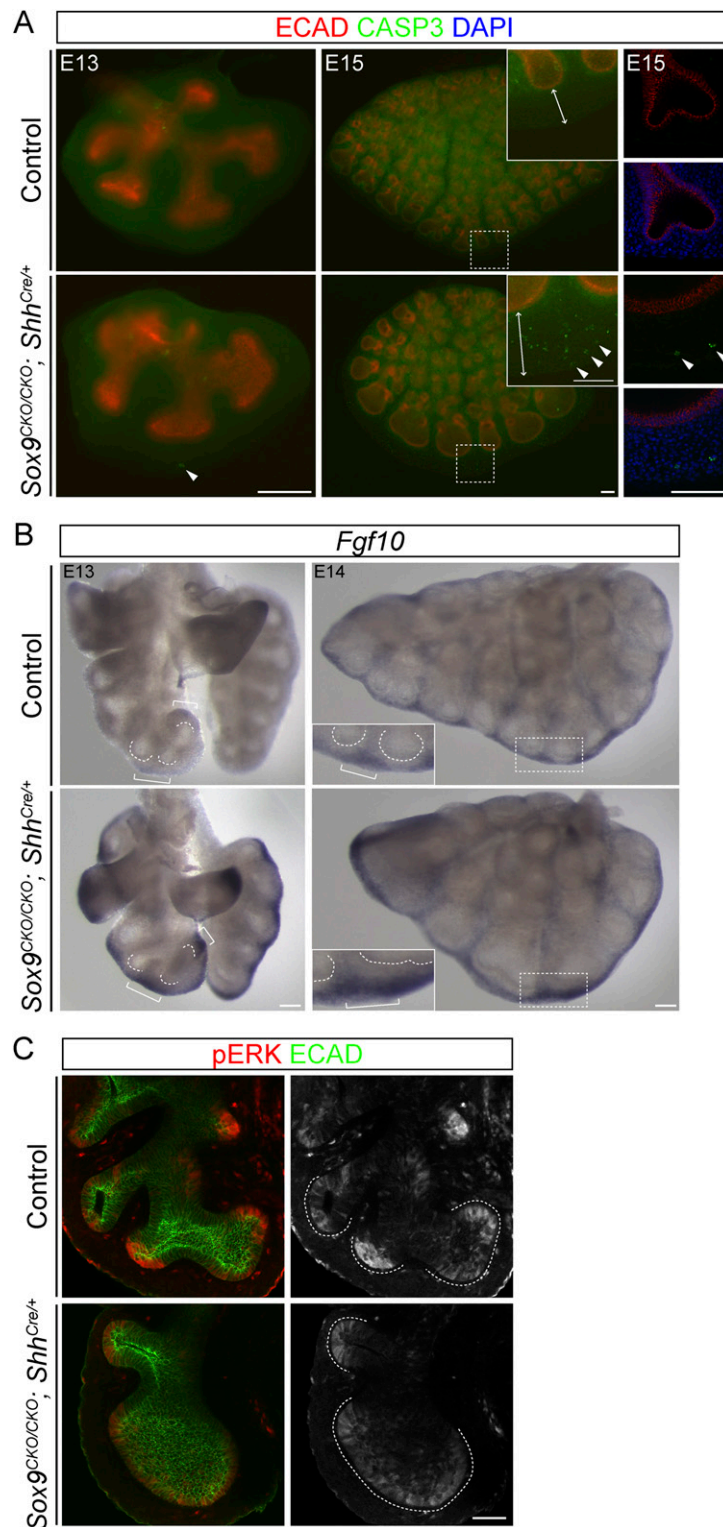

**Fig. 510.** *Sox9* regulates mesenchymal cell survival and *Fgf10* signaling. (A) Stereoscope images of whole-mount lungs from littermate control and Sox9<sup>CKO/CKO</sup>; Shh<sup>Cre/+</sup> mutant embryos, immunostained for ECAD, cleaved Caspase-3 (CASP3), and DAPI. The boxed areas are enlarged (*insets*). The number of apoptotic cells in the mesenchyme of the Sox9<sup>CKO/CKO</sup>; Shh<sup>Cre/+</sup> mutant lungs increases from E13 to E15 (arrowheads). Confocal images of the E15 lungs are shown in the rightmost column. Compared with the confocal images, the stereoscope images are a projection view of the whole lung and therefore have more background autofluorescence and more apoptotic cells. Double-headed arrows indicate the increased distance between the epithelium and the mesothelium in the Sox9 mutant lung. (Scale bars, 100  $\mu$ m.) (B) *Fgf10* whole mount in situ hybridization of littermate control and Sox9<sup>CKO/CKO</sup>; Shh<sup>Cre/+</sup> mutant lungs. The boxed areas are shown as insets. Square brackets indicate increased *Fgf10* expression in the Sox9 mutant lung. Branch tips are traced with dashed lines. (Scale bar, 100  $\mu$ m.) (C) Confocal images of E13 whole-mount littermate control and Sox9<sup>CKO/CKO</sup>; Shh<sup>Cre/+</sup> mutant lungs, immunostained for phosphorylated extracellular signal-regulated kinase (pERK) and ECAD. pERK staining appears more diffuse in the Sox9 mutant lung. Branch tips are traced with dashed lines. (Scale bar, 50  $\mu$ m.)

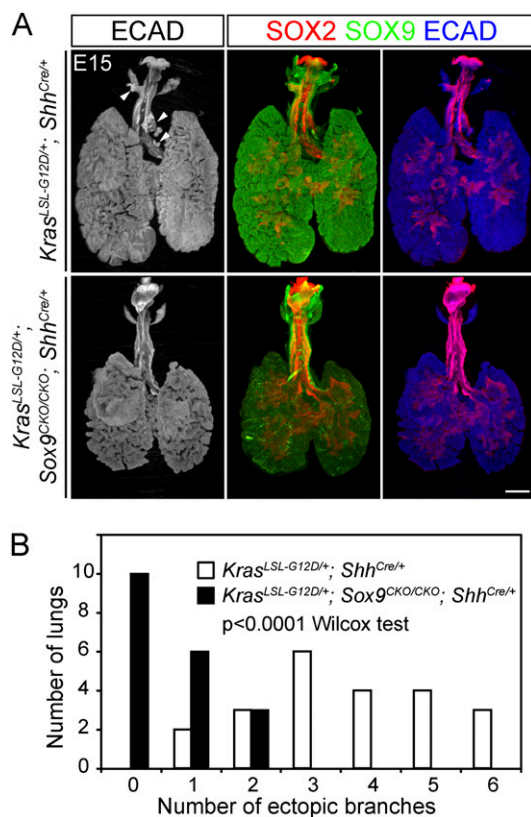

**Fig. S11.** Epithelial deletion of *Sox9* suppresses ectopic branches in the *Kras* mutant lung. (A) OPT images of whole-mount immunostained E15 littermate *Kras<sup>LSL-G12D/+</sup>; Shh<sup>Cre/+</sup>* mutant and *Kras<sup>LSL-G12D/+</sup>; Sox9<sup>CKO/CKO</sup>; Shh<sup>Cre/+</sup>* mutant lungs. Ectopic branches in the *Kras<sup>LSL-G12D/+</sup>; Shh<sup>Cre/+</sup>* mutant lung continue to grow from E13 (Fig. 4B) to E15 (arrowheads), but are suppressed by epithelial deletion of *Sox9*. (Scale bar, 500  $\mu$ m.) (B) There is a significant difference ( $P < 0.0001$ , Wilcoxon test) in the frequency distributions of ectopic branches formed on tracheal and extrapulmonary left/right main bronchial epithelia between E13 *Kras<sup>LSL-G12D/+</sup>; Shh<sup>Cre/+</sup>* (open column) and *Kras<sup>LSL-G12D/+</sup>; Sox9<sup>CKO/CKO</sup>; Shh<sup>Cre/+</sup>* (filled column) mutant lungs. No ectopic branches are present in either control or *Sox9<sup>CKO/CKO</sup>; Shh<sup>Cre/+</sup>* mutant lungs.

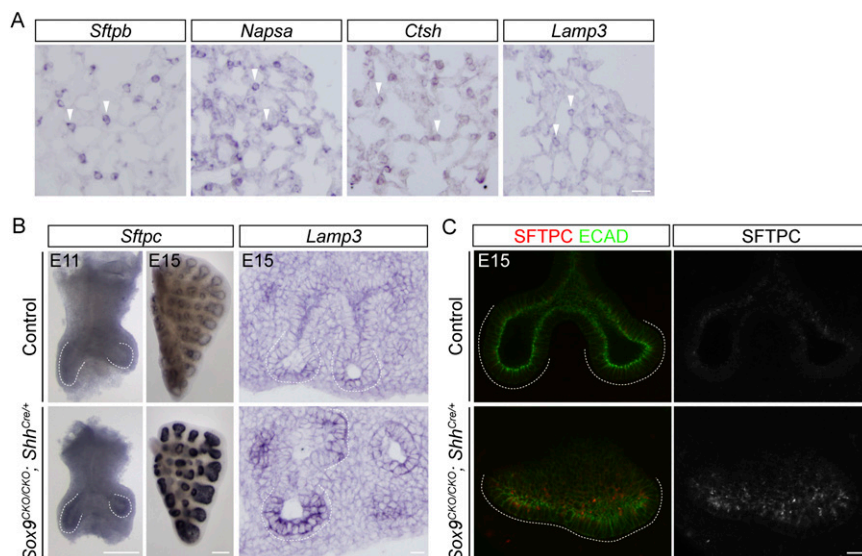

**Fig. S12.** Precocious initiation of alveolar differentiation in the *Sox9* mutant lung. (A) Section in situ hybridization of an adult lung for indicated genes. Arrowheads indicate expression in alveolar type II cells. (Scale bar, 20  $\mu$ m.) (B) Whole-mount (*Sftpc*) (Scale bar, 200  $\mu$ m) and section (*Lamp3*) (Scale bar, 20  $\mu$ m) in situ hybridization of littermate control and *Sox9<sup>CKO/CKO</sup>; Shh<sup>Cre/+</sup>* mutant lungs. Branch tips are traced with dashed lines. We note that *Sftpc* is expressed at a low level in the control lung and up-regulated in the *Sox9* mutant lung. (C) Confocal images of whole-mount immunostained littermate control and *Sox9<sup>CKO/CKO</sup>; Shh<sup>Cre/+</sup>* mutant lungs. Branch tips are traced with dashed lines. (Scale bar, 20  $\mu$ m.)



**Dataset S1. Microarray expression profiling of FACS-purified distal lung epithelial cells from E14 through E19**

[Dataset S1](#)

The original expression values are converted to a  $\log_2$  scale when comparing with baseline expression at E14. The two experiments are biological repeats using lungs from independent litters.

**Dataset S2. Microarray expression comparison between littermate control and *Sox9*<sup>CKO/CKO</sup>;*Shh*<sup>Cre/+</sup> mutant lungs at E13, E14, and E15**

[Dataset S2](#)

The original expression values are converted to a  $\log_2$  scale when comparing control and *Sox9* mutant lungs. The two experiments are biological repeats using lungs from independent litters.
